# Supplementary material for: 5-Hydroxymethylcytosine in Cell-Free DNA Predicts Immunotherapy Response in Lung Cancer
Source: MDPI journal article supplement (doi:10.3390/cells13080715), 2024-04-19
Supplement: s1 [file s1]

# 5-hydroxymethylcytosine in cell-free DNA predicts immunotherapy response in lung cancer

Jianming Shao, Yitian Xu, Randall J. Olsen, Saro Kasparian, Kai Sun, Sunil Mathur, Jun Zhang, Chuan He, Shu-Hsia Chen, Eric H. Bernicker, Zejuan Li

## Contents

|                                                                                                                                                        |            |
|--------------------------------------------------------------------------------------------------------------------------------------------------------|------------|
| Table S1. Patient demographics and baseline characteristics. ....                                                                                      | 2          |
| Table S2. List of genes associated with immune checkpoint inhibitor treatment response. ....                                                           | Attachment |
| Table S3. Wp-scores of lung cancer samples treated with immunotherapy. ....                                                                            | Attachment |
| Table S4. Multivariate Cox regression analysis in patients with PD-L1 expression. ....                                                                 | 3          |
| Table S5. Therapeutic response to immune checkpoint inhibitors predicted by tumor PD-L1 expression. ....                                               | 3          |
| Table S6. Prediction accuracy by the 5hmC signature and tumor PD-L1 expression. ....                                                                   | 4          |
| Figure S1. Study design for cell-free DNA 5hmC predictive model for lung cancer immunotherapy. ....                                                    | 5          |
| Figure S2. Prediction of overall survival by a 5hmC predictive signature in lung cancer patients receiving immune checkpoint inhibitor treatment. .... | 6          |
| Figure S3. Immune checkpoint inhibitor treatment response predicted by tumor PD-L1 expression. ....                                                    | 7          |
| Figure S4. Treatment response predicted by the 5hmC predictive signature in lung cancer patients not receiving immune checkpoint inhibitors. ....      | 8          |

**Table S1. Patient demographics and baseline characteristics.**

| <b>Characteristics</b>           | <b>All patients<br/>(N=83)</b> | <b>Training<br/>(n=24)</b> | <b>Validation<br/>(n=16)</b> | <b>Test<br/>(n=18)</b> | <b>Non-ICI<br/>group<br/>(n=27)</b> |
|----------------------------------|--------------------------------|----------------------------|------------------------------|------------------------|-------------------------------------|
| <b>Age, median (range), y</b>    | 69 (48-92)                     | 70 (50-92)                 | 72 (48-90)                   | 67 (53-83)             | 69 (51-89)                          |
| <b>Female, No. (%)</b>           | 45 (54.2)                      | 9 (37.5)                   | 9 (56.2)                     | 8 (44.4)               | 20 (74.1)                           |
| <b>Race, No. (%)</b>             |                                |                            |                              |                        |                                     |
| <b>Asian</b>                     | 4 (4.8)                        | 0                          | 0                            | 1 (5.6)                | 3 (11.1)                            |
| <b>Black</b>                     | 18 (21.7)                      | 6 (25.0)                   | 4 (25.0)                     | 1 (5.6)                | 7 (25.9)                            |
| <b>Caucasian</b>                 | 60 (72.3)                      | 18 (75.0)                  | 12 (75.0)                    | 16 (88.9)              | 16 (59.3)                           |
| <b>Unavailable</b>               | 1 (1.2)                        | 0                          | 0                            | 0                      | 1 (3.7)                             |
| <b>ECOG PS, No. (%)</b>          |                                |                            |                              |                        |                                     |
| <b>0</b>                         | 6 (7.2)                        | 1 (4.2)                    | 2 (12.5)                     | 2 (11.1)               | 1 (3.7)                             |
| <b>1</b>                         | 62 (74.7)                      | 19 (79.2)                  | 13 (81.2)                    | 16 (88.9)              | 16 (59.3)                           |
| <b>2</b>                         | 1 (1.2)                        | 1 (4.2)                    | 0                            | 0                      | 0                                   |
| <b>3</b>                         | 2 (2.4)                        | 1 (4.2)                    | 0                            | 0                      | 1 (3.7)                             |
| <b>4</b>                         | 3 (3.6)                        | 1 (4.2)                    | 0                            | 0                      | 2 (7.4)                             |
| <b>Unavailable</b>               | 9 (10.8)                       | 1 (4.2)                    | 1 (6.2)                      | 0                      | 7 (25.9)                            |
| <b>Smoking status, No. (%)</b>   |                                |                            |                              |                        |                                     |
| <b>Current</b>                   | 13 (15.7)                      | 3 (12.5)                   | 2 (12.5)                     | 3 (16.7)               | 5 (18.5)                            |
| <b>Former</b>                    | 57 (68.7)                      | 20 (83.3)                  | 13 (81.2)                    | 15 (83.3)              | 11 (40.7)                           |
| <b>Never</b>                     | 13 (15.7)                      | 1 (4.2)                    | 1 (6.2)                      | 0                      | 11 (40.7)                           |
| <b>Histology, No. (%)</b>        |                                |                            |                              |                        |                                     |
| <b>NSCLC</b>                     |                                |                            |                              |                        |                                     |
| <b>Adenocarcinoma</b>            | 59 (71.1)                      | 18 (75.0)                  | 8 (50.0)                     | 13 (72.2)              | 22 (81.5)                           |
| <b>Squamous</b>                  | 19 (22.9)                      | 6 (25.0)                   | 6 (37.5)                     | 4 (22.2)               | 3 (11.1)                            |
| <b>Other subtypes</b>            | 3 (3.6)                        | 0                          | 2 (12.5)                     | 1 (5.6)                | 0                                   |
| <b>SCLC</b>                      | 2 (2.4)                        | 0                          | 0                            | 0                      | 2 (7.4)                             |
| <b>Disease stage, No. (%)</b>    |                                |                            |                              |                        |                                     |
| <b>III</b>                       | 12 (14.5)                      | 2 (8.3)                    | 5 (31.2)                     | 0                      | 5 (18.5)                            |
| <b>IV</b>                        | 71 (85.5)                      | 22 (91.7)                  | 11 (68.8)                    | 18 (100.0)             | 22 (81.5)                           |
| <b>PD-L1 expression, No. (%)</b> |                                |                            |                              |                        |                                     |
| <b>&lt;1%</b>                    | 42 (50.6)                      | 14 (58.3)                  | 9 (56.2)                     | 10 (55.6)              | 11 (40.7)                           |
| <b>≥1%</b>                       | 32 (38.6)                      | 9 (37.5)                   | 5 (31.2)                     | 8 (44.4)               | 10 (37.0)                           |
| <b>Unavailable</b>               | 9 (10.8)                       | 1 (4.2)                    | 2 (12.5)                     | 0                      | 6 (22.2)                            |
| <b>PFS, median (range), mo</b>   | 6.6<br>(0.2-63.1)              | 7.0<br>(1.4-34.1)          | 6.3<br>(0.5-42.4)            | 8.7<br>(1.8-63.1)      | 5.4<br>(0.2-56.2)                   |
| <b>OS, median (range), mo</b>    | 12.4<br>(0.2-63.1)             | 14.1<br>(1.4-40.5)         | 9.8<br>(2.5-42.4)            | 17.8<br>(2.1-63.1)     | 9.1<br>(0.2-56.2)                   |

ECOG PS, Eastern Cooperative Oncology Group performance status score; NSCLC, non-small cell lung cancer; SCLC, small cell lung cancer; ICI, immune checkpoint inhibitor; PFS, progression-free survival; OS, overall survival.

**Table S4. Multivariate Cox regression analysis in patients treated with immune checkpoint inhibitors.**

|                            | <b>HR (95% CI)</b> | <b>P</b>              |
|----------------------------|--------------------|-----------------------|
| Wp-score (Low vs High)     | 0.11 (0.04-0.29)   | 9.30×10 <sup>-6</sup> |
| Age (≥ 60 y vs <60 y)      | 0.69 (0.26-1.90)   | 0.47                  |
| Sex (Female vs Male)       | 0.57 (0.27-1.20)   | 0.13                  |
| Race (Caucasian vs Black)  | 0.88 (0.39-2.00)   | 0.76                  |
| Smoker (Current vs Former) | 2.60 (1.00-6.20)   | 0.04                  |
| PD-L1 TPS (≥ 1% vs <1%)    | 0.73 (0.36-1.50)   | 0.38                  |

Progression-free survival multivariate Cox regression analysis were performed in 51 patients treated with immune checkpoint inhibitors, considering wp-score (low vs high), age (≥ 60 vs < 60-year-old), sex (female vs male), race (Caucasian vs Black), smoking status (current vs former), and tumor PD-L1 TPS (≥ 1% vs <1%). Wp-score, weighted-predictive score. TPS, PD-L1 tumor proportion score. HR, hazard ratio. CI, confidence interval.

**Table S5. Therapeutic response to immune checkpoint inhibitors predicted by tumor PD-L1 expression.**

**Non-STOMP**

|                | <b>Responders (No.)</b> | <b>Non-responders (No.)</b> | <b>Objective response rate (95% CI)</b> |
|----------------|-------------------------|-----------------------------|-----------------------------------------|
| PD-L1 TPS ≥ 1% | 7                       | 6                           | 53.9% (25.1%-80.8%)                     |
| PD-L1 TPS < 1% | 11                      | 8                           | 57.9% (33.5%-79.8%)                     |

**STOMP clinical trial**

|                | <b>Responders (No.)</b> | <b>Non-responders (No.)</b> | <b>Objective response rate (95% CI)</b> |
|----------------|-------------------------|-----------------------------|-----------------------------------------|
| PD-L1 TPS ≥ 1% | 3                       | 5                           | 37.5% (8.5%-75.5%)                      |
| PD-L1 TPS < 1% | 5                       | 5                           | 50.0% (18.7%-81.3%)                     |

Responders: patients with complete or partial response to immune checkpoint inhibitor treatment who did not progress within six months after the treatment. Non-responders: patients with progression or stable disease or with response but progressed within six months after ICI treatment. TPS, PD-L1 tumor proportion score.

**Table S6. Prediction accuracy by the 5hmC signature and tumor PD-L1 expression.**

**Non-STOMP**

|          | <b>Consistent (No.)</b> | <b>Inconsistent (No.)</b> | <b>Overall accuracy (95% CI)</b> |
|----------|-------------------------|---------------------------|----------------------------------|
| Wp-score | 27                      | 5                         | 84.4% (67.2%-94.7%)              |
| PD-L1    | 15                      | 17                        | 46.9% (29.1%-65.3%)              |

**STOMP clinical trial**

|          | <b>Consistent (No.)</b> | <b>Inconsistent (No.)</b> | <b>Overall accuracy (95% CI)</b> |
|----------|-------------------------|---------------------------|----------------------------------|
| Wp-score | 16                      | 2                         | 88.9% (65.3%-98.6%)              |
| PD-L1    | 8                       | 10                        | 44.4% (21.5%-69.2%)              |

Consistent indicates the prediction is consistent with clinical response status. Inconsistent indicates the prediction is not consistent with clinical response status. CI, confidence interval.

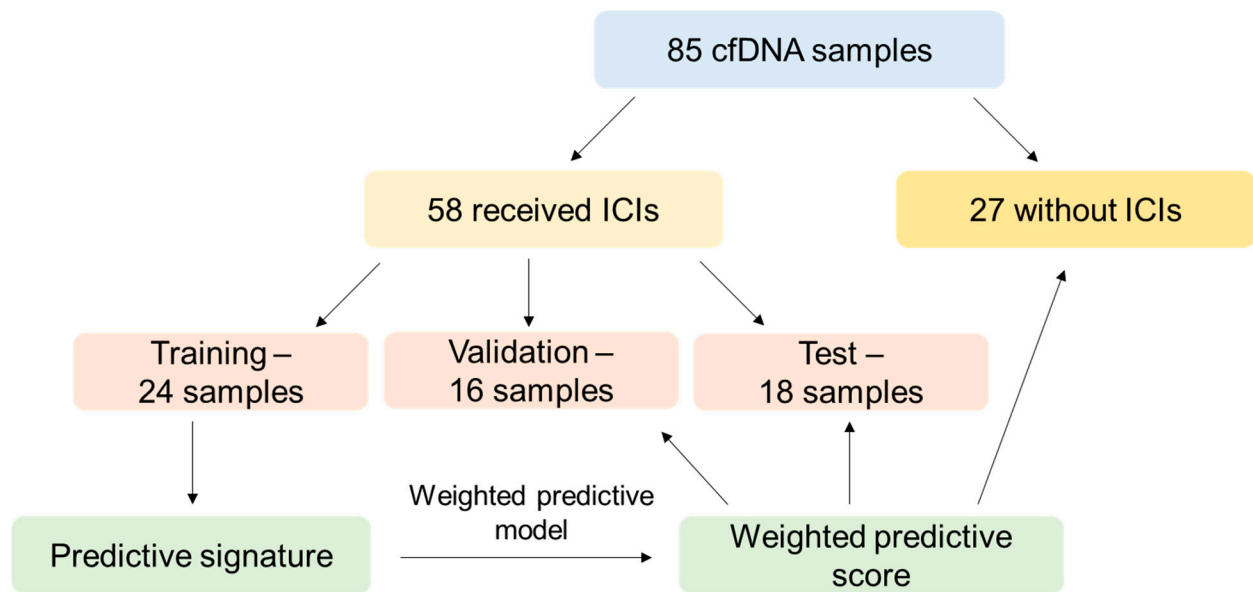

**Figure S1. Study design for cell-free DNA 5hmC predictive model for lung cancer immunotherapy.**

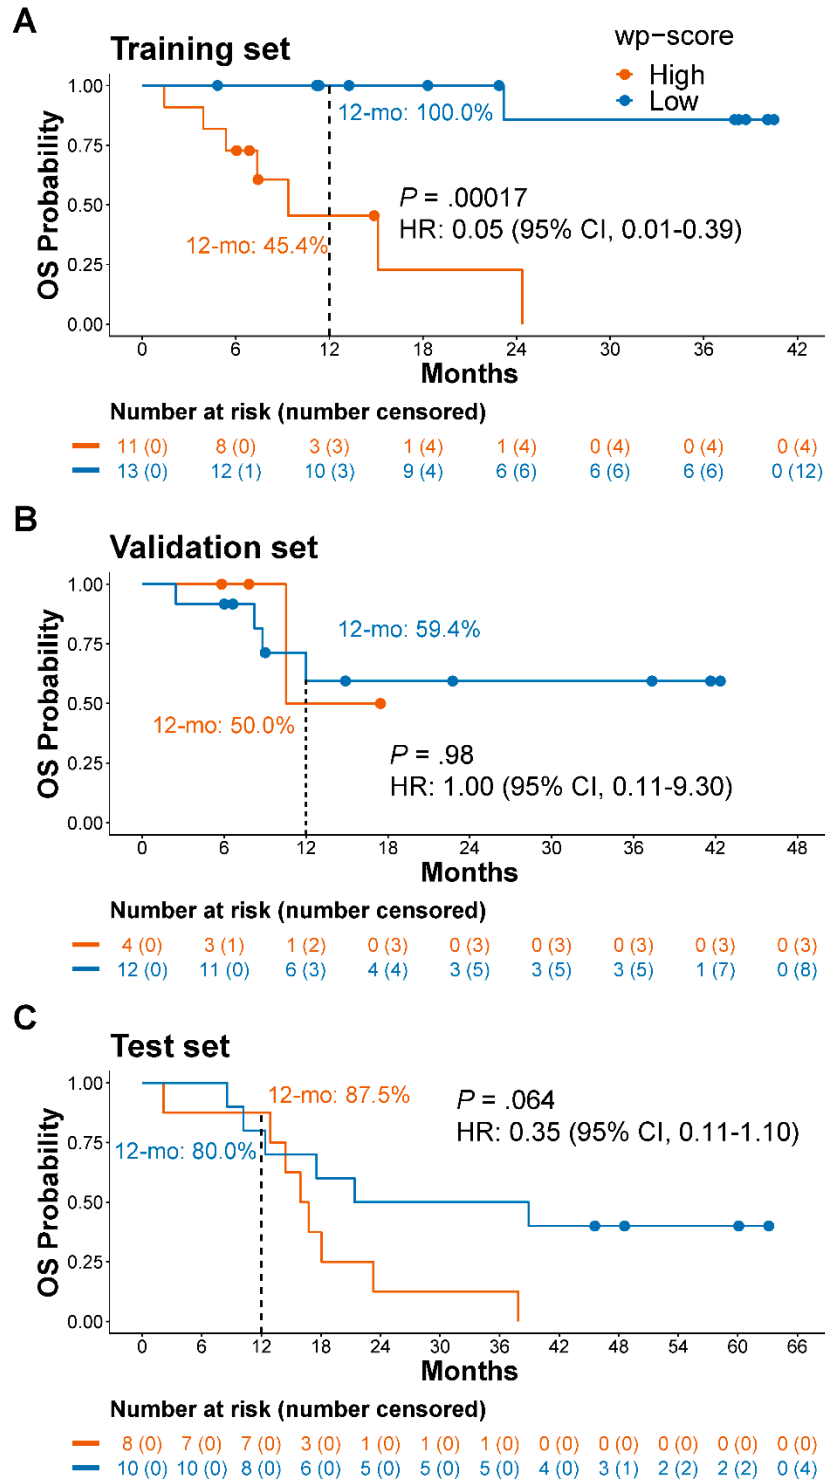

**Figure S2. Prediction of overall survival by a 5hmC predictive signature in lung cancer patients receiving immune checkpoint inhibitor treatment.** (A, B, C) Kaplan-Meier analysis of overall survival (OS) based on weighted predictive (wp)-scores in the training set (A), the validation set (B), and the test set (C). 12-mo, estimated OS in 12 months. Dots on the survival curve indicate that a patient was censored. HR, hazard ratio. CI, confidence interval.

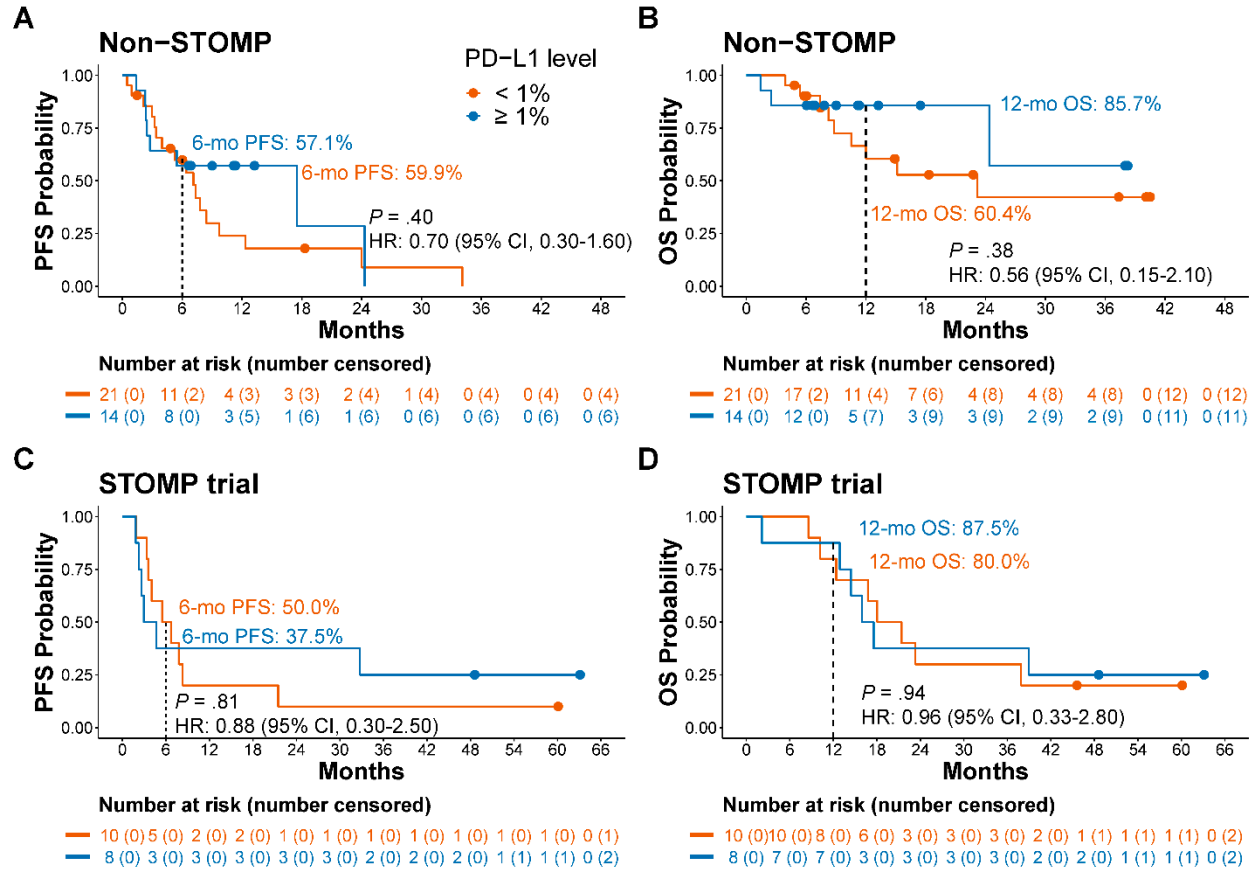

**Figure S3. Immune checkpoint inhibitor treatment response predicted by tumor PD-L1 expression.** Kaplan-Meier analysis of progression-free survival (PFS, A) and overall survival (OS, B) in non-STOMP patients treated with immune checkpoint inhibitors based on tumor PD-L1 expression. Kaplan-Meier analysis of PFS (C) and OS (D) in STOMP clinical trial patients treated with immune checkpoint inhibitors based on tumor PD-L1 expression. HR, hazard ratio. CI, confidence interval.

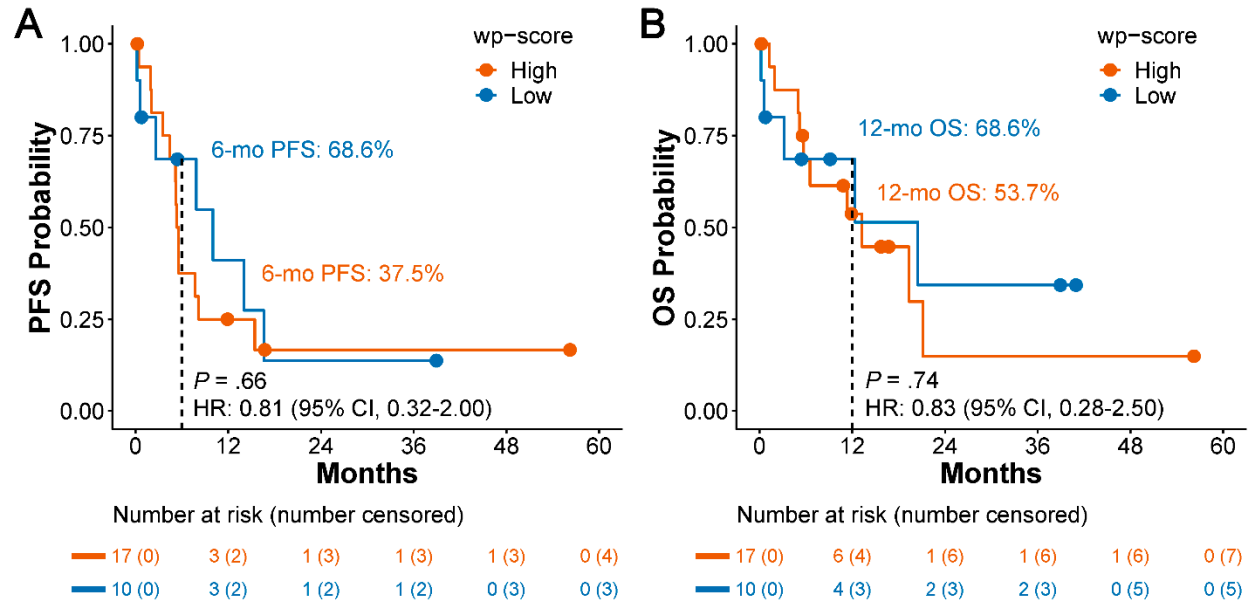

**Figure S4. Treatment response predicted by the 5hmC predictive signature in lung cancer patients not receiving immune checkpoint inhibitors.** Kaplan-Meier analysis of progression-free survival (PFS, A) and overall survival (OS, B) in patients who did not receive immune checkpoint inhibitor treatment based on weighted prediction (wp)-scores.
